# Supplementary material for: Investigating Unmet Demand for Family Planning and its Potential Impacts on Timor-Leste's Demographic Future
Source: Research Square preprint supplement (doi:10.21203/rs.3.rs-6797973/v1), 2025-07-28
Supplement: Supplementary file 1 [file aa1477ed28086bed51b05de2.docx]

# Appendix 1

This section provides information on the additional population projection assumptions not included in the manuscript, namely mortality and overseas migration. These assumptions are taken from the 2024 World Population Prospects.

**Sex ratio at birth**

A consistent assumption of 107.1 males to every 100.0 females is applied to births.

**Life Expectancy**

Life expectancy is estimated at 65.7 years for males and 69.1 for females in 2022. This is projected to increase to 70.6 and 74.8 respectively by 2052. The default UN produced country-specific life table is selected for modelling mortality outcomes across the population.

**Overseas Migration**

Total overseas migration assumptions are set out in Table 1.1.

Table .1: Total projected overseas migration for Timor-Leste, 2022 to 2052. Source: World Population Prospects.

|  | Male | Female |
| --- | --- | --- |
| 2022 | -2,760 | -2,759 |
| 2023 | -2,809 | -2,811 |
| 2024 | -1,282 | -1,270 |
| 2025 | -1,283 | -1,270 |
| 2026 | -834 | -865 |
| 2027 | -339 | -403 |
| 2028 | 194 | 63 |
| 2029 | 315 | 176 |
| 2030 | 541 | 373 |
| 2031 | -623 | -674 |
| 2032 | -1,360 | -1,347 |
| 2033 | -1,195 | -1,204 |
| 2034 | -209 | -315 |
| 2035 | 1,095 | 875 |
| 2036 | -557 | -625 |
| 2037 | -134 | -250 |
| 2038 | -335 | -415 |
| 2039 | 420 | 253 |
| 2040 | -712 | -774 |
| 2041 | -515 | -595 |
| 2042 | 851 | 636 |
| 2043 | 760 | 561 |
| 2044 | -1,380 | -1,386 |
| 2045 | -601 | -674 |
| 2046 | -728 | -799 |
| 2047 | 159 | 4 |
| 2048 | 679 | 481 |
| 2049 | -545 | -623 |
| 2050 | 1,139 | 896 |
| 2051 | -1,912 | -1,877 |
| 2052 | -194 | -324 |
| *Ave.* | *-457* | *-547* |

The migration age profiles are set out in figure 1.2.

Table 1.: Overseas migration age profiles for Timor-Leste, selected years. Source: World Population Prospects.

|  | Male | | | Female | | |
| --- | --- | --- | --- | --- | --- | --- |
|  | 2022 | 2052 | Average | 2022 | 2052 | Average1 |
| 0-4 | 6.0 | 10.3 | 10.1 | 5.9 | 10.5 | 10.1 |
| 5-9 | 2.7 | 6.7 | 6.5 | 2.7 | 6.8 | 6.5 |
| 10-14 | 2.5 | 5.2 | 4.4 | 2.7 | 4.6 | 4.5 |
| 15-19 | 10.4 | 36.1 | 9.0 | 11.5 | 22.2 | 6.2 |
| 20-24 | 18.7 | 74.2 | 19.6 | 20.0 | 46.9 | 13.9 |
| 25-29 | 18.2 | -1.0 | 16.1 | 18.7 | 6.8 | 18.0 |
| 30-34 | 13.8 | -14.9 | 10.5 | 13.7 | -3.1 | 13.2 |
| 35-39 | 9.5 | -9.8 | 6.7 | 9.1 | -1.9 | 8.5 |
| 40-44 | 6.3 | -4.6 | 4.5 | 5.8 | -0.3 | 5.4 |
| 45-49 | 4.2 | -2.6 | 3.2 | 3.7 | 0.0 | 3.7 |
| 50-54 | 2.8 | 0.0 | 2.5 | 2.4 | 0.9 | 2.7 |
| 55-59 | 1.8 | 0.0 | 1.9 | 1.5 | 1.5 | 2.1 |
| 60-64 | 1.2 | 0.0 | 1.6 | 0.9 | 1.5 | 1.9 |
| 65-69 | 0.8 | 0.0 | 1.5 | 0.6 | 1.5 | 1.5 |
| 70-74 | 0.6 | 0.0 | 1.5 | 0.4 | 1.5 | 1.5 |
| 75-79 | 0.4 | 0.5 | 0.3 | 0.3 | 0.3 | 0.3 |
| 80+ | 0.1 | 0.0 | 0.0 | 0.0 | 0.0 | 0.0 |

1 An error was identified for the 2047 for females, creating improbably large flows. Data from this year was replaced with an average of 2046 and 2048
